# Supplementary material for: Characteristics and outcomes of multisystem inflammatory syndrome in children: A multicenter, retrospective, observational cohort study in Mexico
Source: PubMed Central journal article supplement (PMC10233130; doi:10.3389/fped.2023.1167871), 2023-05-18
Supplement: Table3.pdf [file Table3.pdf]

**Supplementary Chart 1. Variables included in Latent Class Analysis**

- . Any cardiac involvement: cardiac arrest OR any one or more of the following findings on Echo:
  - Myocardial depression (left ventricular ejection fraction < 55%)
  - Coronary aneurysms (coronary artery diameter z-score  $\geq 2.5$ )
  - Dilatation (z-score  $>2$ – $<2.5$ )
  - Mitral or aortic valve insufficiency
  - Myocardial infarction
  - Other abnormalities reported
- 2. Gastrointestinal involvement: Vomiting or diarrhea
- 3. Gastrointestinal involvement: Abdominal pain
- 4. Respiratory failure (any one of the following):
  - CPAP
  - Conventional ventilation
- 5. Kawasaki features: Conjunctivitis (bilateral, bulbar, non-suppurative)
- 6. Kawasaki features: Lymphadenopathy (cervical  $>1.5$  cm diameter)
- 7. Kawasaki features: Rash (widespread, polymorphous, not vesicular)
- 8. Kawasaki features: Lips and mucosa (red cracked lips, strawberry tongue, erythematous oral cavity)
- 9. Kawasaki features: Changes of extremities (erythema, edema of palms and soles initially)
- 10. Any other rash
- 11. Hypotension
- 11. Albumin – low  $< 3$ g/dl
- 13. Raised ALT ( $>82$  IU/L if  $<1$ yr,  $>56$  IU/L if  $<3$ yr,  $>58$  IU/L if  $<7$ yr,  $>72$  IU/L if  $<13$ yr,  $>74$  IU/L if 13-15yr)
- 14. Raised ferritin ( $>300$  ug/L)
- 15. Raised D-dimers ( $>560$  ng/ml)
- 16. Confusion
- 17. Creatinine (for  $<4$ yr  $\geq 78$  umol/L, 5-11 years  $\geq 106$  umol/L, 12-15 years  $\geq 180$  umol/L)
- 18. Platelets ( $<150 \times 10^3$  cells/mm<sup>3</sup>)
- 19. Positive SARS-CoV-2 PCR test
- 20. Positive SARS-CoV-2 serology test
